# Supplementary material for: Characteristic Signs on T2*-Based Imaging and Their Relationship with Results of Reperfusion Therapy for Acute Ischemic Stroke: A Systematic Review and Evidence to Date
Source: PubMed Central journal article supplement — Neurointervention. 2018 Aug 31;13(2):90–9. doi: 10.5469/neuroint.2018.01039 (PMC6132033; doi:10.5469/neuroint.2018.01039), 2018-08-31
Supplement: neuroint-2018-01039-suppl1.pdf [file neuroint-2018-01039-suppl1.pdf]

**Supplementary material. Search strategies**

Searches were undertaken by using the following specific search queries for electronic databases, without language restriction. We considered all publications included from the earliest available year of online indexing up to May 2018.

**Search Query for Pubmed**

#1 (“susceptibility vessel sign”) OR “susceptibility weighted”) OR “gradient echo” OR T2\*

#2 ((stroke) OR “Brain Ischemia”) OR “Stroke”[Mesh] OR “Brain Ischemia”[Mesh]

#3 ((((((“endovascular procedure”) OR “Endovascular Procedures”[Mesh]) OR thrombectomy) OR “Thrombectomy”[Mesh])) OR ((((((“Thrombolytic Therapy”[Mesh]) OR “Mechanical Thrombolysis”[Mesh]) OR tissue plasminogen activator) OR “Tissue Plasminogen Activator”[Mesh]) OR intravenous t-PA) OR “intravenous t-PA”) OR “intravenous rt-PA”

#1 AND #2 AND #3

**Search Query for Embase**

#1 ‘susceptibility vessel sign’ OR ‘susceptibility weighted’ OR ‘gradient echo’ OR ‘T2\*’ OR ‘swi’ OR ‘GRE’

#2 ‘stroke/exp OR ‘stroke’ OR ‘brain ischemia/exp OR ‘brain ischemia’ OR ‘ischemic stroke/exp OR ‘ischemic stroke’

#3 ‘thrombectomy/exp OR ‘thrombectomy’ OR ‘endovascular’ OR ‘stent retriever’ OR ‘thrombolysis/exp OR ‘thrombolytic therapy/exp OR ‘thrombolysis’ OR ‘tissue plasminogen factor’ OR ‘rt-pa’ OR ‘t-pa’

#1 AND #2 AND #3

**Search Query for Cochrane Database of Systematic Reviews**

#1 (susceptibility vessel sign) OR (susceptibility weighted) OR (gradient echo) OR (T2\*)

#2 (stroke) OR (Brain Ischemia) OR (MeSH descriptor: [Stroke]) OR “(MeSH descriptor: [Brain Ischemia])

#3 ((endovascular procedure) OR (MeSH descriptor: [Endovascular Procedure]) OR (thrombectomy) OR (MeSH descriptor: [Thrombectomy])) OR ((MeSH descriptor: [Thrombolytic Therapy]) OR (MeSH descriptor: [Mechanical Thrombolysis]) OR (tissue plasminogen activator) OR (MeSH descriptor: [Tissue Plasminogen Activator]) OR (intravenous t-PA) OR (intravenous t-PA”) OR (intravenous rt-PA))

#1 AND #2 AND #3
