# Supplementary material for: Characteristic Signs on T2*-Based Imaging and Their Relationship with Results of Reperfusion Therapy for Acute Ischemic Stroke: A Systematic Review and Evidence to Date
Source: PubMed Central journal article supplement — Neurointervention. 2018 Aug 31;13(2):90–9. doi: 10.5469/neuroint.2018.01039 (PMC6132033; doi:10.5469/neuroint.2018.01039), 2018-08-31
Supplement: neuroint-2018-01039-suppl2.pdf [file neuroint-2018-01039-suppl2.pdf]

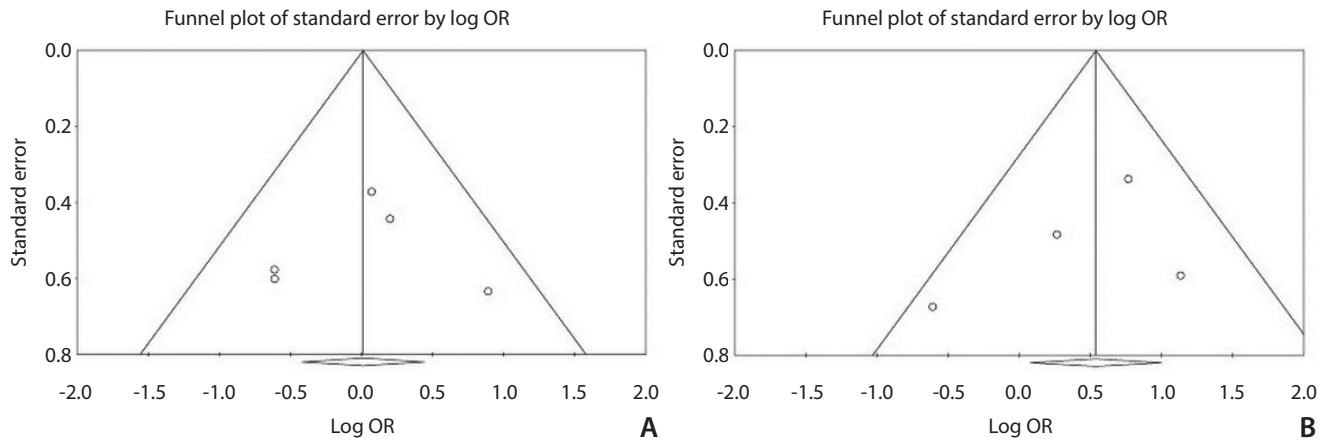

**Supplementary Fig. 1.** (A) Funnel plot of studies reporting ORs for recanalization after mechanical thrombectomy and the presence of an SVS. (B) Funnel plot of studies reporting ORs recanalization after intravenous thrombolysis and the presence of an SVS. SVS, susceptibility vessel sign; OR, odds ratio.
